# Supplementary material
Source: PubMed Central journal article supplement (PMC5288826)
Supplement: AEM.02548-16_zam999117649s1.pdf [file AEM.02548-16_zam999117649s1.pdf]

**Supplemental material for “Multiple evolutionary trajectories have led to the emergence of races in *Fusarium oxysporum* f. sp. *lycopersici*.”, Biju V.C. et al.**

**Supplemental material and methods**

**Details of the assembly of clone 9G3**

Sequencing of BAC clone 9G3 and *de novo* assembly resulted in three scaffolds, notably 47 (approximately 35 kb in length), 56 (31 kb) and 53 (22 kb), hence in a contiguous sequence with two gaps (Supplemental figure 2A). The three scaffolds could easily be ordered because of the presence of BAC vector sequences at one end of both scaffold 47 and 53. Using primer pairs 4241/4242 and 4239/4240 corresponding to sequences flanking the two gaps in the 9G3 sequence (Supplemental figure 2A and Supplemental table 1), fragments could be PCR-amplified (Supplemental figure 2B) and sequenced.

The gap between scaffolds 56 and 53 appeared to be a sequence of 6122 bp representing a *Helitron* (*HelB*). The gap between scaffolds 56 and 47 was found not to be a real gap but rather the result of a mis-assembly, most likely due to the presence of another *Helitron* copy (*HelA*) at the end of scaffold 47. Comparing the 9G3 gap closed sequence with the genome sequence of the Fol reference strain (Fol4287) revealed that it fully aligns with a genomic region in the lineage specific (LS) chromosome 14, namely with supercontig (sc) 2.22: 651200 to 712754, except for a unique fragment containing *AVRI* (Supplemental figure 2A).

Sc2.22 is composed of a large number of contigs of which four (partly) align with 9G3, namely contigs 852, 853, 854 and 855 (Supplemental figure 2A). These contigs are separated by sequence gaps and the availability of 9G3 allowed closing of these gaps. Using primer pair 4618/4619 (Supplemental table 1) a 6.4 kb fragment could be amplified from both Fol4287 genomic DNA and 9G3 DNA (data not shown). Sequencing confirmed the identity of the amplified fragments and let us conclude that the gap between contigs 852 and 853 was the result of a mis-assembly due to the presence in this region of an *NHT2*-like retrotransposon. Similarly, PCR analysis using primer pair 4620/4621 (Supplemental table 1) and sequencing indicated that the gap between contigs 853 and 854 can be explained by a mis-assembly due to the presence of a *Fot5* DNA transposon (data not shown).

The third gap (between contigs 854 and 855) appeared to be located within a copy of transposable element *Yaret2* that precedes a second *Yaret2* copy on contig 855, suggesting the presence of two *Yaret2* copies in a row. However, in 9G3 only one copy was identified.

Using primer set 4625/4630 (Supplemental table 1) a 3.7 kb fragment could be amplified from genomic DNA of both Fol4287 and Fol004 as well as from and 9G3 DNA (data not shown). Sequence analysis confirmed the presence of two *Yaret2* copies in tandem sharing the LTR that separates the open reading frame of the two copies. This suggests that during assembly of the 9G3 insert sequence one copy was missed due to a high level of sequence similarity. The length of the full 9G3 insert was found to be 98694 nucleotides in total.

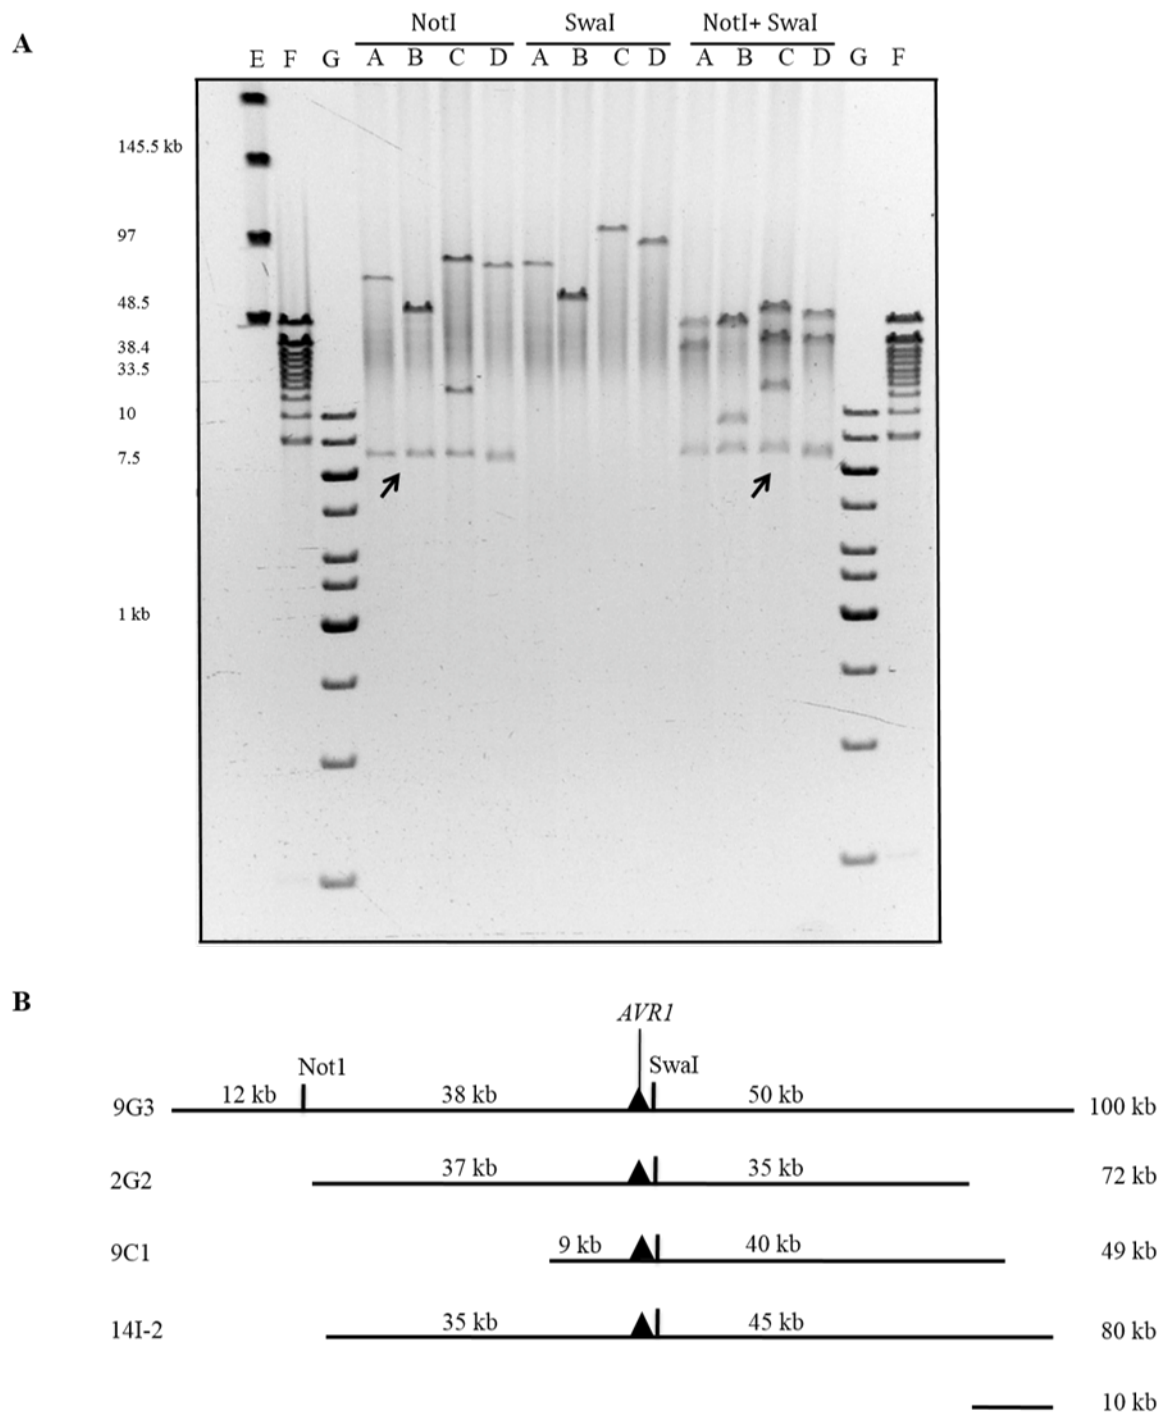

**Figure S1. Analysis of BAC clones with an insert containing the *AVRI* locus**

(A) DNA of BAC clones 2G2, 9C1, 9G3 and 14I-2, selected from a Fol004-BAC library, was digested with either NotI or SwaI alone or with both enzymes. NotI was chosen to cut out the insert from the BAC vector (the vector pBleoBAC11 contains two NotI sites in the region flanking the insert). SwaI was chosen to estimate the approximate location of *AVRI* in the insert (The analysis of 2.8 kb *AVRI* genomic region revealed a SwaI site 294 bp downstream of *AVRI* stop codon; the vector pBleoBAC11 does not carry a SwaI site). DNA fragments were separated on a 1% agarose CHEF gel at 5- to 15-s linear ramp time, 6 V/cm, 14°C in 0.5× TBE buffer for 18 h, and stained with ethidium bromide. The 7.5 kb band present in the NotI digests (indicated by arrows) corresponds to the cloning vector. A: clone 2G2, B: clone 9C1, C: clone 9G3, D: clone 14I-2, E: Lambda ladder, F: 8-48 kb ladder, G: GeneRuler 1 kb DNA Ladder (0.25 – 10 kb). (B) Schematic representation of the relative positions of the BAC inserts containing *AVRI*. The insert sizes and the positions of NotI and SwaI sites are deduced from the restriction analysis. The position of *AVRI* was inferred from the position of the SwaI site.

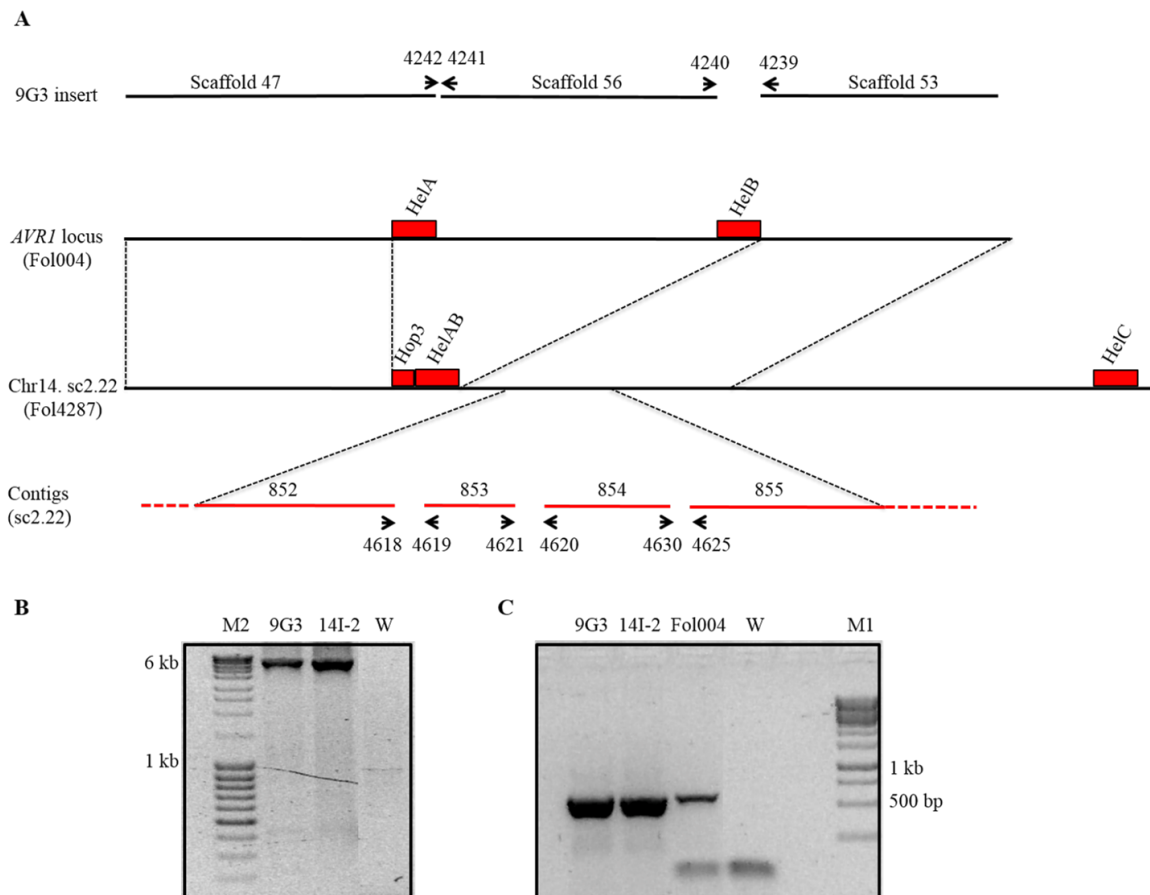

**Figure S2. Assembly of the 9G3 insert.**

(A) Schematic representation of 9G3 insert mapped to a genomic region in supercontig (sc) 2.22 of chromosome 14 of Fol4287. The order of three scaffolds corresponding to the sequence of the 9G3 insert is shown above. Arrows indicate the location of the primers used to fill the gaps between the scaffolds. Red lines indicate the contigs of sc2.22 corresponding to this genomic region. Arrows indicate the location of the primers used to fill the gaps between the contigs. (B) Left: amplification of a PCR product of 6.2 kb using the primer pair 4240/4239. Right: amplification of a PCR product of 600 bp using the primer pair 4242/4241. W: water control, M1: GeneRuler 1 kb DNA Ladder (0.25 - 10 kb), M2: MassRuler DNA Ladder Mix (0.08 - 10 kb), W: Water control.

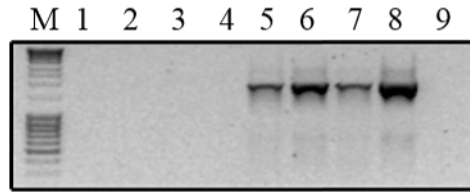

**Figure S3. Confirmation of the absence of *Helitron B* (*HelB*) in some race 1 isolates.**

PCR experiment showing the presence/absence of a 1.8 kb fragment in the genomic DNA of different race 1 isolates (lanes 1-8) using primer pair 4345/4340 (these primers correspond to the 5' and 3' flanking sequences of *HelB*, respectively). Lane 1: Fol001, lane 2: Fol003, lane 3: Fol004, lane 4: Fol006, lane 5: Fol009, lane 6: Fol010, lane 7: Fol011, lane 8: Fol016, lane 9: water control, M: MassRuler™ Low Range DNA Ladder (80-1031 bp).

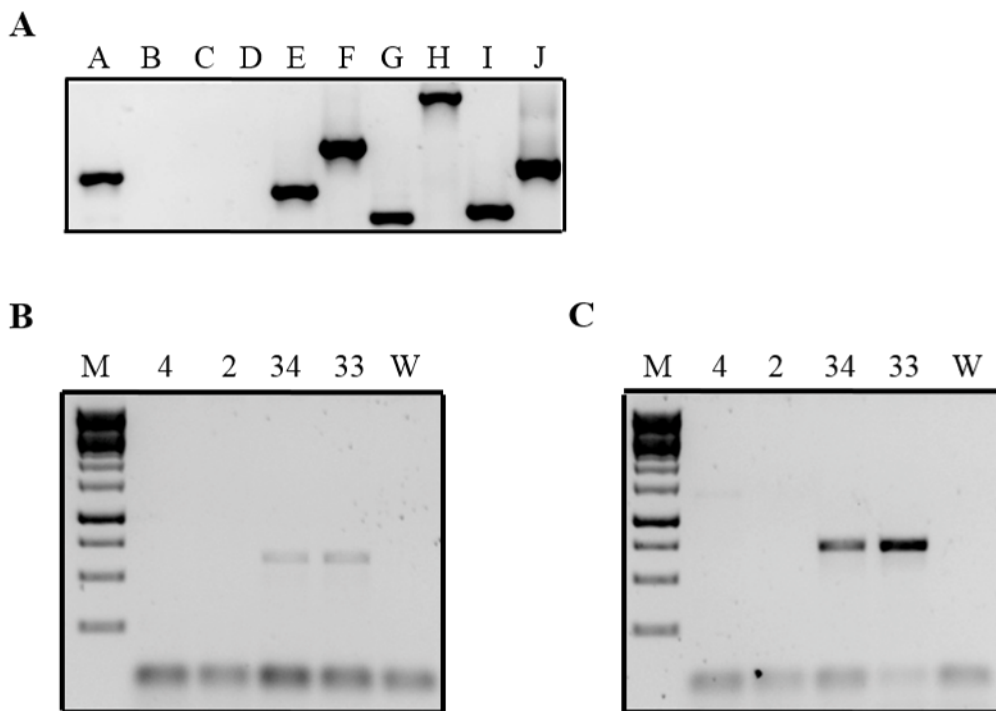

**Figure S4. Fol4287 and Fol033 contain a *Hop3* insertion at the 5' end of *HelAB*.**

(A) Amplification of PCR fragments from the genomic DNA of Fol4287 with primer pairs A-J. The absence of a PCR product with primer pair B indicates a *Hop3* insertion at the 5' end of *HelAB*. (B) A product of 624 bp was amplified only from Fol4287 and Fol033 using primer pair 4304/4298. (C) A product of 723 bp was amplified only from Fol4287 and Fol033 using primer pair 4303/4297. M: Marker, 1: Fol004, 2: Fol002, 3: Fol4287, 4: Fol033, W: water control.

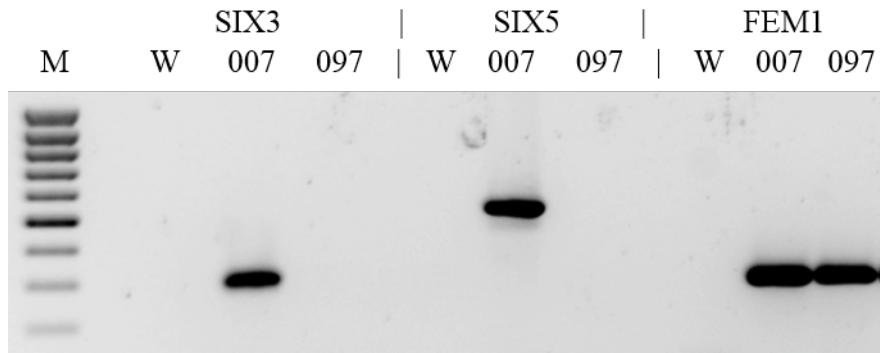

**Figure S5: Six5 is absent in Fol097.**

We used PCR to determine whether, in addition to *AVR2*, Six5 is absent from Fol097. The left three lanes show presence and absence of amplicons obtained using primer pair 962+963 (corresponding to a 273 bp fragment) in water (W, negative control), Fol007 and Fol097. We confirmed the absence of *AVR2* (SIX3) in Fol097. The middle three lanes show presence and absence of amplicons obtained using primer pair 1993+1994 (corresponding to a 524 bp fragment) in water, Fol007 and Fol097. We show the absence of Six5 in Fol097. The right three lanes are our positive control: primer pairs 157+158 correspond to a 274 bp region in the Fem1 promoter. Primers are listed in Supplemental table 1 and we used MassRuler DNA Ladder Mix (ThermoFisher) as a marker for fragment sizes.

**Table S1. Primers used in this study**

| Number | Sequence               | Targeting gene/genomic position in 4287    |
|--------|------------------------|--------------------------------------------|
| 4539   | AAGCGAGAGAAAACGGGAAGC  | 5956 bp upstream HelA                      |
| 4540   | AATGTTTAGGACGGCAATACC  | 5158 bp upstream HelA                      |
| 4298   | TGAAGCAAGTAGCTGAGG     | 316 bp upstream HelA                       |
| 4297   | TGCCTCTTTGCTCTGAAGG    | Specific to 5' end of Helitrons            |
| 4242   | ACAAGTCACAAAGCATCAC    | Specific to 3' end of Helitrons            |
| 4241   | TTGACGACACGTTCAACATC   | 201 bp downstream HelA                     |
| 4345   | TAGCTGGCGCATTGATAG     | 429 bp upstream HelB                       |
| 4340   | ACAACGGGGACATTGATGGC   | 1382 bp downstream HelB                    |
| 4355   | AAGAGTGGTTAAGCGACTTC   | 2333 bp downstream HelB                    |
| 4354   | TGGGTACTGCATGGTAATG    | 3369 bp downstream HelB                    |
| 4309   | TTGTGGAGGCAGCCGTTTGG   | 14369 bp downstream HelB                   |
| 4306   | TGTCATACATTGAGGATGG    | 14772 bp downstream HelB                   |
| 4395   | TCCTCACAATGCTGACATCG   | 1550 bp upstream HelC                      |
| 4371   | AGCGTGGACTTGAGTTCTGC   | 38 bp downstream HelC                      |
| 4541   | TGTGCTCAGCCACATCAGC    | 824 bp downstream HelC                     |
| 4542   | TCGGTGCGAATCAAAGCACC   | 1545 bp downstream HelC                    |
| 4866   | TAAGTCTCAATGGTCTCTCG   | Chr14: SC22:97075 -97096                   |
| 4867   | TTGCCGACGAAGTTATCAG    | Chr14: SC22:97606 -97625                   |
| 4890   | TGATAATGTCGTTGCAAGAC   | Chr14: SC22:98193 -98213                   |
| 4891   | ACTGATTTCTCGTCGACTGC   | Chr14: SC22:99021 -99041                   |
| 4967   | TCAGAAAGACTTGTTATTTGC  | Chr14: SC22:106083 -106103                 |
| 4968   | TTGCCACTGGAAGACTGC     | Chr14: SC22:106420 -106439                 |
| 5023   | AATCCATCTTCCAGAATCAAC  | Chr14: SC22:219341 -219362                 |
| 5024   | TTATCAGACATACTCGATTC   | Chr14: SC22:219847 -219867                 |
| 5025   | TCAGACAACAAGCACATTC    | Chr14: SC22:229717 -229736                 |
| 5026   | ATGGCCGTTACTGTGCGAGAC  | Chr14: SC22:230051 -230071                 |
| 4874   | ATCTTGCTGGTGGCGAAAACG  | Chr14: SC22:243580 -243601                 |
| 4875   | TTTATTAGCGAAGGGAGAGC   | Chr14: SC22:243869 -243889                 |
| 4749   | TGTATTCAAGGCTCACATCGG  | Chr14: SC22:532710 -532731                 |
| 4750   | TGCTACATATGCCCTAGTACG  | Chr14: SC22:533499 -533519                 |
| 4880   | AGGGTCGCTTAGGTATTGG    | Chr14: SC22:556590 -556610                 |
| 4881   | TATCGTCGTAATAGAAGTCC   | Chr14: SC22:557050 -557070                 |
| 4751   | TGGTATCATATGCCATTACGG  | Chr14: SC22:561892 -561913                 |
| 4752   | TTATTAAGAGCTGAGAACCG   | Chr14: SC22:562803 -562823                 |
| 4618   | TGCCCAATTTCACTTACACAG  | Chr14: SC22:692515 -692536                 |
| 4732   | TCTCGCTCTCGTAGATAGCC   | Chr14: SC22:693395 -693415                 |
| 4733   | AACCACGCATCCTCTGTGAC   | Chr14: SC22:697926 -697946                 |
| 4626   | TTCATCTCTGTATAAGACACG  | Chr14: SC22:69813 -698533                  |
| 4309   | TTGTGGAGGCAGCCGTTTGG   | Chr14: SC22:703559 -703579                 |
| 4306   | TGTCATACATTGAGGATGG    | Chr14: SC22:703941 -703961                 |
| 4616   | TTCGGTTGGAATCGATCCAG   | Chr14: SC22:711336 -711356                 |
| 4617   | TCATTCACTCTCTCGTGTC    | Chr14: SC22:711679 -711699                 |
| 4395   | TCCTCACAATGCTGACATCG   | 1550 bp upstream HelC                      |
| 4297   | TGCCTCTTTGCTCTGAAGG    | Specific to 5' end of Helitrons            |
| 1091   | TCAGGCTTCACTTAGCATAAC  | <i>AVR1</i> ORF                            |
| 4239   | TGTTGCATACAGACAGCTGAG  | 19278 bp downstream <i>AVR1</i> stop codon |
| 4240   | AATCAGGAACTCACGCTTCG   | 12747 bp downstream <i>AVR1</i> stop codon |
| 4619   | ATCATAACGTTAGTCAATTC   | 28921 bp downstream <i>AVR1</i> stop codon |
| 4620   | ACATAGCCATCCACTCATCC   | 31210 bp downstream <i>AVR1</i> stop codon |
| 4621   | TGACTATGAATTGAGCTAACG  | 28915 bp downstream <i>AVR1</i> stop codon |
| 4625   | ACCGTGGTACTGTCATACATTG | 33849 bp downstream <i>AVR1</i> stop codon |
| 4630   | TATGGACAATACAGAGACG    | 34853 bp downstream <i>AVR1</i> stop codon |
| 4303   | ACTTCCCAGTGACAAAACGC   | Specific to 5' end of Hop3                 |
| 4304   | TACTCGAACGATAAACTGG    | Specific to 5' end of Hop3                 |
| 1033   | GCCGACCGAAAAACCTAA     | <i>AVR1</i> ORF                            |
| 2934   | CCAGCCAGAAGGCCAGTTT    | <i>AVR2</i> ORF                            |
| 964    | GGCAATTAACCACTCTGCC    | <i>AVR2</i> ORF                            |
| 1002   | TATCCCTCCGGATTTGAGC    | <i>AVR3</i> ORF                            |
| 363    | AATAGAGCCTGCAAAGCATG   | <i>AVR3</i> ORF                            |
| 1416   | GGAGTACCAGTGATCATGTT   | <i>EF-1a</i> ORF                           |
| 889    | TCGCTGCATCGGCCACGTC    | <i>EF-1a</i> ORF                           |
| 1723   | CGATGCCTTGACCGAAAGTT   | <i>AVR2</i> -upstream                      |
| 1236   | AGTGGTAAATGTTTAGGCAAG  | <i>AVR2</i> -upstream                      |
| 1237   | TTCTGTGGCAGTTCCCTT     | <i>AVR2</i> -downstream                    |
| 1238   | GGTGTGTTGAACAGGTGCT    | <i>AVR2</i> -downstream                    |

---

|      |                        |                 |
|------|------------------------|-----------------|
| 157  | ATGAAGTACTCTCGCTACC    | <i>FEM1</i> ORF |
| 158  | GGTAAAAGTGAAAAGAGTCACC | <i>FEM1</i> ORF |
| 962  | TGAGCGGGCTGGCAATTC     | <i>AVR2</i> ORF |
| 963  | CAATCCTCTGAGATAGTAAG   | <i>AVR2</i> ORF |
| 1993 | GCGCTTCGAGTACATCTCTG   | <i>SIX5</i> ORF |
| 1994 | CTAGGCCGCATCACAATAGA   | <i>SIX5</i> ORF |

---



**Table S2. Transposable elements on the insert of 9G3**

| <b>Classification</b>        |                    |               |                                   |              |            |            |            |                    |
|------------------------------|--------------------|---------------|-----------------------------------|--------------|------------|------------|------------|--------------------|
| <b>Order</b>                 | <b>Superfamily</b> | <b>Family</b> | <b>Designation</b>                | <b>Size</b>  | <b>LTR</b> | <b>TIR</b> | <b>TSD</b> | <b>Coordinates</b> |
| <b>Class I</b>               |                    |               |                                   |              |            |            |            |                    |
| LTR                          | Gypsy\Ty3          |               | MAGGY-like                        | 5717         | 152        |            |            | 44144 - 49860      |
|                              | Copia\Ty1          |               | NHT2-like                         | 5610         | 176        |            | 8          | 75725 - 81334      |
|                              |                    |               | NHT2-like fragment                | 211          |            |            |            | 14114 - 4324       |
|                              | Unclassified       |               | Yaret2                            | 4840         | 195        |            |            | 86539 - 91378      |
|                              |                    |               | Yaret2                            | 4840         | 195        |            |            | 91184 - 96083      |
|                              | Solo-LTR           |               | MAGGY-like solo-LTR               | 152          |            |            |            | 74512 - 74663      |
|                              |                    |               | Skippy-solo-LTR                   | 431          |            |            |            | 59963 - 60393      |
| LINE                         |                    |               | MGR583 like LINE element          | 5353         |            |            |            | 8403 - 13755       |
|                              |                    |               | MGR583-like LINE element          | 665          |            |            |            | 17893 - 18557      |
|                              |                    |               | MGR583-like LINE element          | 86           |            |            |            | 6588 - 6673        |
|                              |                    |               | MGR583-like LINE element fragment | 59           |            |            |            | 6944 - 7002        |
| SINE                         |                    |               | Foxy fragment                     | 156          |            |            |            | 7778 - 7933        |
| Unrelated                    |                    |               | Marsu                             | 2328         |            |            |            | 20822 - 23149      |
| <b>Class II</b>              |                    |               |                                   |              |            |            |            |                    |
| <b>Subclass 1</b>            |                    |               |                                   |              |            |            |            |                    |
| TIR                          | TC1\mariner        | Pogo          | Fot5                              | 1869         |            | 42         | 2          | 53449 - 55317      |
|                              |                    |               | Fot5                              | 1860         |            | 44         | 2          | 81947 - 83806      |
|                              |                    |               | Fot3-partial                      | 247          |            |            |            | 75478 - 75724      |
|                              |                    |               | Fot3-partial                      | 603          |            |            |            | 81337 - 81939      |
|                              |                    | hAT           | hAT-1                             | 3093         |            | 11         | 8          | 55469 - 58559      |
|                              |                    |               | Tfo1-partial                      | 1644         |            |            |            | 49861 - 51504      |
|                              |                    |               | Hormin                            | 759          |            | 15         | 8          | 26669 - 27427      |
|                              |                    |               | YahAT7 fragment                   | 71           |            |            |            | 28744 - 28814      |
|                              |                    |               | YahAT7 fragment                   | 528          |            |            |            | 34923 - 35450      |
|                              |                    | Mutator       | Hop6 fragment                     | 2038         |            |            |            | 24631 - 26668      |
|                              |                    |               | Hop6 fragment                     | 1308         |            |            |            | 27436 - 28743      |
|                              |                    | MITE          | mimp3                             | 215          |            | 27         | 2          | 24102 - 24316      |
|                              |                    |               | mimp1                             | 222          |            | 27         | 2          | 4879 - 5101        |
|                              |                    |               | mimp1                             | 223          |            | 27         | 2          | 5546 - 5767        |
|                              |                    |               | mimp4-partial                     | 86           |            |            |            | 51652 - 51737      |
| <b>Class II</b>              |                    |               |                                   |              |            |            |            |                    |
| <b>Subclass 2</b>            |                    |               |                                   |              |            |            |            |                    |
|                              |                    |               | Helitron                          | 6108         |            |            |            | 28815 - 34922      |
|                              |                    |               | Helitron                          | 6123         |            |            |            | 65981 - 72103      |
| <b>Class II</b>              |                    |               |                                   |              |            |            |            |                    |
| <b>Unclassified</b>          |                    |               |                                   |              |            |            |            |                    |
|                              |                    |               | Unclassified                      | 233          |            | 26         | 2          | 3885 - 4120        |
|                              |                    |               | Unclassified                      | 859          |            | 21         |            | 19969 - 20827      |
| <b>Total size of the TEs</b> |                    |               |                                   | <b>58537</b> |            |            |            |                    |

**Table S3. Non-transposable ORFs on the insert of 9G3**

| <b>ORF</b>  | <b>Size</b> | <b>Position in 9G3</b> | <b>Homologous gene</b>                                      | <b>Position in strain 4287</b>                                                                                                    | <b>Remarks</b>                                                 |
|-------------|-------------|------------------------|-------------------------------------------------------------|-----------------------------------------------------------------------------------------------------------------------------------|----------------------------------------------------------------|
| <i>ORF1</i> | 2727        | 1140 - 3866            | <i>FOXG_14233</i>                                           | Chr14: Supercontig 22: 652339-655065 -                                                                                            |                                                                |
| <i>ORF2</i> | 2600        | 15079 - 17678          | <i>FOXG_14234</i>                                           | Chr14: Supercontig 22: 666276-668875 +                                                                                            | Bifunctional catalase-                                         |
| <i>ORF3</i> | 6114        | 36089 - 42202          | <i>FOXG_06805</i><br><i>FOXG_07365</i><br><i>FOXG_16388</i> | Chr03: Supercontig 7: 1924520-1931400<br>Chr06: Supercontig 9: 2323584-2330452 -<br>Unpositioned: Supercontig 34: 451087-457955 - | Encode protein with Helicase domain and Rep domain             |
| <i>AVRI</i> | 793         | 52222 - 53014          | No homologue                                                |                                                                                                                                   | Avirulence gene corresponding to R gene <i>I</i> or <i>I-1</i> |
| <i>ORF4</i> | 828         | 62898 - 63725          | <i>FOXG_22916</i><br><i>FOXG_14128</i><br><i>FOXG_12409</i> | Unpositioned: Supercontig 68: 1286-2722 -<br>Chr14: Supercont2.51:71494-72306 -<br>Chr03: Supercontig 18: 68914-70292 -           | Unknown                                                        |
| <i>ORF5</i> | 2189        | 72260 - 74448          | <i>FOXG_14236</i>                                           | Chr14: Supercontig 22:689228-691416 +                                                                                             | Highly similar to secreted oxidoreductase <i>ORX1</i>          |
| <i>ORF6</i> | 942         | 74643 - 75584          | <i>FOXG_14237</i>                                           | Chr14: Supercontig 22: 691611-692552 +                                                                                            | recQ family helicase                                           |
| <i>ORF7</i> | 1136        | 85183 - 86318          | <i>FOXG_14238</i>                                           | Chr14: Supercontig 22: 702268-703400 +                                                                                            | recQ family helicase                                           |
| <i>ORF8</i> | 477         | 97014 - 97490          | <i>FOXG_14240</i>                                           | Chr14: Supercontig 22: 711073-711549 -                                                                                            | Unknown                                                        |
